# Supplementary material for: A machine-learning powered liquid biopsy predicts response to Paclitaxel plus Ramucirumab in advanced gastric cancer: Results from the prospective IVY trial
Source: Research Square preprint supplement (doi:10.21203/rs.3.rs-7059542/v1), 2025-07-14
Supplement: Supplementary file 1 [file 946c04aa875a052f387139fc.docx]

**Supplemental Table S1.** Characteristics of this study

|  | Discovery cohort | | Validation cohort | |
| --- | --- | --- | --- | --- |
|  | Non-responder (n = 9) | Responder (n = 19) | Non-responder (n = 35) | Responder (n = 80) |
| Age mean ± SD (years) | 64.9 ± 3.9 | 65.9 ± 2.6 | 67.2 ± 1.5 | 67.9 ± 1.0 |
| Gender |  |  |  |  |
| Male | 6 (67%) | 13 (68%) | 22 (63%) | 60 (75%) |
| Female | 3 (33%) | 6 (32%) | 13 (37%) | 20 (25%) |
| Body mass index |  |  |  |  |
| < 18 | 3 (33%) | 18 (95%) | 22 (63%) | 71 (89%) |
| ≥ 18 | 6 (67%) | 1 (5%) | 13 (37%) | 9 (11%) |
| Primary tumor location |  |  |  |  |
| Upper third | 3 (33%) | 7 (37%) | 8 (23%) | 24 (30%) |
| Lower two thirds | 6 (67%) | 12 (63%) | 27 (77%) | 56 (70%) |
| Histological type |  |  |  |  |
| Diffuse type | 3 (33%) | 5 (26%) | 12 (34%) | 24 (30%) |
| Intestinal type | 6 (67%) | 14 (74%) | 23 (66%) | 56 (70%) |
| Metastatic site |  |  |  |  |
| Hematogenous | 8 (89%) | 17 (89%) | 30 (86%) | 63 (79%) |
| Peritoneal or Lymphatic | 1 (11%) | 2 (11%) | 5 (14%) | 17 (21%) |
| History of primary lesion resection |  |  |  |  |
| Present | 2 (22%) | 2 (11%) | 11 (31%) | 22 (28%) |
| Absent | 7 (78%) | 17 (89%) | 24 (69%) | 58 (72%) |
| HER2 status |  |  |  |  |
| Positive | 0 (0%) | 2 (11%) | 3 (9%) | 16 (20%) |
| Negative | 9 (100%) | 17 (89%) | 32 (91%) | 64 (80%) |
| SD, standard deviation. |  |  |  |  |

**Supplemental Table S2**. Logistic regression analysis for candidate 10-exo-miRNAs in discovery cohort.

| Variable | OR (95%CI) | P value |
| --- | --- | --- |
| hsa-miR-624-5p | 1.78 (1.17-3.00) | 0.014 |
| hsa-miR-548ad-5p | 1.83 (1.16-3.18) | 0.016 |
| hsa-miR-25-5p | 2.17 (1.33-3.86) | 0.004 |
| hsa-miR-450a-5p | 2.36 (1.43-4.86) | 0.004 |
| hsa-miR-125a-5p | 0.19 (0.03-0.59) | 0.023 |
| hsa-miR-10b-5p | 0.26 (0.06-0.71) | 0.028 |
| hsa-miR-335-3p | 0.36 (0.12-0.79) | 0.027 |
| hsa-miR-10a-5p | 0.17 (0.02-0.59) | 0.033 |
| hsa-miR-139-5p | 0.18 (0.03-0.60) | 0.026 |
| hsa-miR-379-5p | 0.27 (0.06-0.70) | 0.031 |

OR, odds ratio, CI, confidence interval.
