# Supplementary material for: A machine-learning powered liquid biopsy predicts response to Paclitaxel plus Ramucirumab in advanced gastric cancer: Results from the prospective IVY trial
Source: Research Square preprint supplement (doi:10.21203/rs.3.rs-7059542/v1), 2025-07-14
Supplement: Supplementary file 2 [file e021436c5d1c30315b733fa3.docx]

| 23228/SLCGC  NCT06490055  https://clinicaltrials.gov/study/ NCT06490055 | **Research Protocol**  **SLCGC 2024** | **SLCGC 2024** |
| --- | --- | --- |

| **Study title** | A Liquid Biopsy To Predict the Efficacy of Second-line Chemotherapy in Gastric Cancer: Prospective IVY trial |
| --- | --- |

| **Protocol Number/Acronym** | | 23228/SLCGC | |
| --- | --- | --- | --- |
| **Clinicaltrial.gov identifier** | | NCT06490055 | |
| **Clinicaltrial.gov link** | | <https://clinicaltrials.gov/study/NCT06490055> | |
| **Version** | 2024 | **Date last update posted** | 2024-07-3 |

| **Promoter** | **Ajay Goel, PhD, AGAF**  Beckman Research Institute, City of Hope |
| --- | --- |
| **Principal Investigator** | **Ajay Goel, PhD, AGAF**  Professor and Chair, Department of Molecular Diagnostics and Experimental Therapeutics, Beckman Research Institute of City of Hope  Associate Director of Basic Sciences, City of Hope Comprehensive Cancer Center  Professor, Irell and Manella Graduate School of Biological Sciences of City of Hope  Director, Biotech Innovations, City of Hope Medical Center  1218 S. Fifth Avenue, Suite 2226, Biomedical Research Center  Monrovia, CA 91016  [ajgoel@coh.org](mailto:ajgoel@coh.org) |
| **Unit** | Department of Molecular Diagnostics and Experimental Therapeutics, Beckman Research Institute of City of Hope, Monrovia, CA |

| **Co-Investigators** | **Katsutoshi Shoda, MD, PhD**  First Department of Surgery, Faculty of Medicine, University of Yamanashi, Yamanashi, Japan  Department of Molecular Diagnostics and Experimental Therapeutics, Beckman Research Institute of City of Hope, Monrovia, California, USA  **Caiming Xu, MD, PhD**  Department of General Surgery, The First Affiliated Hospital of Dalian Medical University, Dalian, China  **Alessandro Mannucci, MD**  Department of Gastroenterology and Gastrointestinal Endoscopy, Vita-Salute San Raffaele University, IRCCS San Raffaele Scientific Institute, Milan, Italy  **Takeshi Nagasaka, MD, PhD**  Department of Clinical Oncology, Kawasaki Medical School, Okayama, Japan  **Daisuke Ichikawa, MD, PhD**  First Department of Surgery, Faculty of Medicine, University of Yamanashi, Yamanashi, Japan |
| --- | --- |

**1 List of abbreviations and definitions**

PTX, paclitaxel

RAM, ramucirumab

OS, overall survival

exo-miRNAs, exosomal microRNAs

**2 Background**

Gastric cancer is one of the leading causes of cancer-related death worldwide. Combination therapy with fluoropyrimidine and platinum agents is one of the major first-line treatments for unresectable or metastatic gastric cancer, and the prolonged survival benefits from several other regimens, including paclitaxel and ramucirumab, have also been demonstrated in various randomized trials. With regards to second-line treatments, the recent RAINBOW trial demonstrated that paclitaxel plus ramucirumab (PTX plus RAM) exhibited a significantly better overall survival (OS) compared to paclitaxel plus placebo in patients with previously treated advanced gastric cancer; hence, this treatment regimen is now being recognized as the standard second-line chemotherapy. The latest NCCN guidelines also recommend PTX plus RAM as the standard treatment for second-line chemotherapy, with a response rate of approximately 30% and a disease control rate of approximately 70%. However, grade 4 neutropenia and febrile neutropenia have been reported in approximately 25% and 5% of patients who receive this treatment, respectively. In other words, ~30% of patients who do not derive any benefit from second-line treatment will not only experience disease progression but will also suffer from the toxicity of such therapy, including a loss of strength and energy. In addition, they may be forced to discontinue or terminate gastric cancer treatment without receiving other treatments that might have provided initial therapeutic effects. This highlights the imperative clinical need for the availability of molecular biomarkers that can help predict resistance to second-line therapy and select the subset of gastric cancer patients who will clinically benefit from such a treatment regimen.

In the context of markers that can predict response to second-line therapy in gastric cancer, the field remains in its infancy. Ideally, considering the biological effects of chemotherapy, such a treatment prediction should be performed in biospecimens obtained prior to the initiation of treatment. Previous studies have measured tumor tissue levels of vascular endothelial growth factor receptor (VEGFR) and VEGF-related genes, which, did not possess any predictive potential despite being related to the mechanism(s) of action of RAM. Furthermore, predictive biomarkers based on tissue examination are not as attractive due to their invasiveness and the challenge of collecting tumor tissue from metastatic tumors before second-line line treatment in patients with gastric cancer. In this regard, liquid biopsies based on tumor-derived exosomal cargo are emerging rapidly and offer several distinct advantages. Exosomes are extracellular vesicles that facilitate intercellular communication by actively transmitting cellular components including DNA, proteins, and noncoding RNAs; hence, a significant number of tumor-derived molecular signatures can be readily interrogated in exosomes. Furthermore, the protective shell of the exosomal membranes mitigates the degradation of molecular entities in bodily fluids and dramatically enhances the stability of exosomal cargo expression. All these key features and the fact that exosome-based liquid biopsies are less invasive and increase patient comfort are emerging as a paradigm-shifting clinical scenario.

Accordingly, we undertook a systematic and comprehensive study by performing genomewide transcriptomic profiling for exosomal microRNAs (exo-miRNAs) to help identify and develop predictive biomarkers of response to second-line therapy by analyzing pre-treatment blood specimens from a prospective clinical cohort, the IVY-Trial. We aim to establish an exo-miRNA-based liquid biopsy model to help predict therapeutic response to PTX + RAM therapy in gastric cancer patients.

**3 Rationale**

Paclitaxel plus ramucirumab is a strong standardized second-line therapy for patients with advanced gastric cancer. However, approximately 30% of patients are non-responders to treatment. Non-response to second-line therapy can result in disease progression as well as loss of both patient fitness and the opportunity to receive other treatments that might have originally had a therapeutic effect. This longitudinal study aims to develop an exosome miRNA-based liquid biopsy to reliably predict non-responders immediately prior to secondary therapy using a systematic and comprehensive approach. Novel exosome miRNA models may lead to more sophisticated and personalized treatment for patients with advanced gastric cancer by supporting non-invasive pre-treatment selection and guiding treatment modification.

**4 Objectives**

This study encompasses phases I, II, and III of biomarker study according to ‘*PRoBE’* study phase classification and it meets the STARD guidelines. It leverages several independent cohorts and advanced machine learning approaches to ultimately develop, train, and validate a liquid biopsy assay.

1. Phase I - The purpose of Phase I is a preclinical and exploratory study to discover a group of biomarkers associated with 2nd line treatment efficacy in gastric cancer. Phase I of this study will use our RNA sequence data.

2. Phase II - The purpose of Phase II is to evaluate whether the biomarkers discovered in Phase I are detectable in blood and to train a prediction panel formula based on exo-miRNAs to predict gastric cancer 2nd line treatment response.

3. phase III - The objective of the phase III study is to validate the clinical assay in prospectively collected samples and to perform a retrospective evaluation (PRoBE).

4.1. Primary objectives

The main objective of the phase I study is to discover biomarkers associated with treatment response to 2nd-line chemotherapy for gastric cancer and to identify responders and non-responders. In this phase of the study, candidates will be selected from RNA sequencing data on the basis of differential expression (log2(fold-change)>1) and statistical significance (Benjamini-Hochberg-adjusted p-value <0.05). If further selection is needed (too many candidates), a more restrictive condition is used.

The primary objective of Phases II and III is the development and validation of a blood-based assay that meets two joint primary endpoints: the specificity of the test should be at least 70% at the lower limit of the 95% confidence interval and the sensitivity should reach at least 80% at the lower limit of the 95% confidence interval.

**4.2. Secondary objectives**

If the primary objective is achieved, this test will be used to evaluate the prognostic value of this test for gastric cancer patients. For this secondary objective, the COX regression hazard model will be used. It may provide prognostic information for patients with gastric cancer prior to receiving 2nd line therapy.

**5 Overall design**

This study encompasses phases I, II, and III of biomarker study according to PRoBE study phase classification and meets the STARD guidelines. It leverages several independent cohorts to address the needs of each of the aforementioned phases.

**5.1. Phase I (*or ‘discovery’)***

In Phase I of this study, we will examine genome-wide expression profiles of circulating exo-miRNAs to discover biomarkers that may predict response to PTX + RAM therapy in gastric cancer.

As a discovery cohort, small RNA sequences will be performed using exo-miRNAs collected from 19 responder and 9 non-responder patients.

**5.2. Phase II ( *‘panel development’ and ‘assay training’)***

After completion of the Phase I of this study, their *bona fide* biomarker status is further assessed in clinical cohorts. In Phase II, we will confirm the stable presence of these markers in blood in the clinical cohort and develop a diagnostic assay suitable for predicting therapeutic response to 2nd line treatment of gastric cancer.

**5.3. Phase III (*or ‘PRoBE validation’)***

In the Phase III study, prospectively collected clinical specimens will be used to validate the diagnostic assays developed in the Phase II study and to perform a retrospective evaluation (PRoBE). This study complied with the Declaration of Helsinki, and all procedures were approved by the Ethics Committee, of Kawasaki Medical School. Written informed consent for participation in the study was obtained from all subjects. All subjects were enrolled between 2018 and 2021.

**6 Type of study**

This is a multiphase biomarker study associated with a prospective clinical study in which blood samples were collected immediately prior to 2nd line treatment of gastric cancer and includes phases I, II, and III (PRoBE classification of biomarker studies). Therefore, Phase I is classified as an exploratory phase study, Phase II as the development phase of the assay, and Phase III as the full validation phase of the assay.

Subjects' blood is collected centrally (City of Hope) for study analysis. The study is not considered potentially risky because it does not require any additional procedures or interventions and does not require different management based on test results. Data and samples were collected at the affiliated centers as well as with the informed consent of the patients. Biological and statistical analyses will be performed at the Department of Molecular Diagnostics and Experimental Therapeutics, Beckman Institute, City of Hope (Prof. Ajay Goel, PhD, AGAF).

**6.1. Subject selection**

Patients with unresectable or recurrent gastric cancer requiring secondary chemotherapy are eligible to participate in this study.

**6.1.1. Inclusion criteria**

- Unresectable or recurrent GC histologically confirmed to be primary adenocarcinoma of the stomach.
- Age over 20 years.
- Eastern Cooperative Oncology Group performance status score of 0-2.
- Written informed consent following full study information is provided to the patient.
- Progression or intolerance for first-line chemotherapy comprising fluorinated pyrimidine and platinum anticancer drugs (cisplatin or oxaliplatin) for advanced GC.
- Presence of evaluable lesions as confirmed using a computed tomography (CT) or magnetic resonance imaging.

**6.1.2. Exclusion criteria**

- Patients with a life expectancy of shorter than 3 months
- Patients with severe complications (angina pectoris, myocardial infarction, or arrhythmia) or uncontrollable diabetes mellitus, blood hypertension, or bleeding tendency.
- Patients with a history of serious allergic reactions or serious drug allergy.
- Patients with a clinically relevant mental disorder that prohibits response to questionnaires.
- Patients for whom the attending physician considered that enrollment in the study is inappropriate.

**6.2. Sample sizes**

The sample size for RNA sequencing data was estimated using the 'RNASeqSampleSize' package in R (Version 2.12.0).

**7. Protocol timelines**

**End of study** January 2024

**Draft statistical report** March 2024

**Final report** April/May 2024

**8. Study procedures and study flow-chart**

Starting from the signature of the informed consent by the patient, the subjects are considered enrolled in the study. Patients are pseudonymized by a unique code. All records identifying the subject are kept confidential and, to the extent permitted by the applicable laws and/or regulations, not be made publicly available. A sequential identification number is automatically attributed to each patient registered in the study. This number identifies the patient and must be included on all case report forms.

The samples collected are gathered according to the partner centers’ IRBs in the Partners’ department (blood). After recording clinical information on the samples, the partner institutions will ship the samples to the Molecular Diagnostics and Experimental Therapeutics Department of the Beckman Institute at City of Hope for analysis.

**9. Study plan phases**

The research plan employs a three-phase design in accordance to PRoBE recommendations and it is compliant with both the STARD guidelines and the Declaration of Helsinki:

1. **Phase I** – This phase will examine genome-wide expression profiles of circulating exo-miRNAs to discover biomarkers that may predict response to PTX + RAM therapy in gastric cancer.As a discovery cohort, small RNA sequencing will be performed using exo-miRNAs collected from 19 responder and 9 non-responder patients.
2. **Phase II** – This phase will further evaluate the authenticity of the biomarkers in the clinical cohort after the completion of Phase I. Phase II will confirm the stable presence of these markers in blood in the clinical cohort and develop diagnostic assays suitable for predicting therapeutic response to second-line treatment of gastric cancer.
3. **Phase III** – The purpose of this phase is to validate the diagnostics developed in the Phase II study and to perform a retrospective evaluation (PRoBE). Clinical specimens collected prospectively will be used. This study complies with the Declaration of Helsinki and all procedures were approved by the Ethics Committee of Kawasaki Medical School. Written informed consent was obtained from all subjects for participation in this study. All subjects were enrolled between 2018 and 2021.

**10. Patient safety**

The study does not study a FDA-Regulated Drug Product nor a FDA-Regulated Device Product. The study is exempt from Human Subjects Protection Review.

**11. Ethical considerations**

**11.1. Responsibilities of the primary investigator(s)**

The Investigator(s) undertake(s) to perform the study in accordance with this Protocol, Good Clinical Practice, and the applicable regulatory requirements.

The Investigator(s) will ensure compliance with the investigational schedule, and procedures required by the protocol. The Investigator(s) agree to provide all information requested in the list of variables in an accurate and legible manner.

**11.2. Ethical conduct of the study**

The study will be performed according the ethical principles laid down in the latest accepted version of the Declaration of Helsinki.

**11.3. Informed consent**

Each patient is informed about the modalities of the clinical study in accordance with the enclosed patient information. The patient is to be informed both in writing and verbally by the investigating physician. The patient must be given opportunity to decide whether or not to participate in this study and to ask questions concerning this. It must also be made clear to the patient that he/she can withdraw from the study at any time without giving reasons and that he/she will not be in any way disadvantaged by this. The points mentioned in the information sheet must be communicated to the patient in language he/she understands. The informing physician and the patient must each personally date and sign an informed consent form with a declaration on data privacy. Any informed consent will be part of the investigator’s file and retained with it. The patient will retain a copy of the patient information.

**11.4. Subject identification**

Starting from the signature of the informed consent by the patient, the subjects are considered enrolled in the study. Patients are pseudonymized by a unique code. All records identifying the subject must be kept confidential and, to the extent permitted by the applicable laws and/or regulations, not be made publicly available. A sequential identification number is automatically attributed to each patient registered in the study. This number identifies the patient and must be included on all case report forms

**12. Data management**

**12.1. Data recording and data keeping**

A list of variables is collected for each subject enrolled into the clinical study. Source Data are the clinical findings and observations, laboratory and test data, and other information contained in Source Documents. Source Documents are the original records (and certified copies of original records); including, but not limited to, hospital medical records, physician or office charts, physician or nursing notes, subject diaries or evaluation checklists, pharmacy dispensing records, recorded data from automated instruments, x-rays, etc. When applicable, information recorded shall match the Source Data recorded on the Source Documents. The PI will keep essential documents according to GCP.

**12.2. Data management**

The collection, management and analysis of data take place in a way that guarantees the confidentiality of the subject's identity. With regard to the possible transfer of data to third countries, the processing will take place according to one of the methods permitted by current law. All analyses are performed within respective limitations of each ethics committee approval and in accordance with good clinical practice and the Declaration of Helsinki.
